# Supplementary material
Source: publisher site journal article supplement (https://www.dovepress.com/get_supplementary_file.php?f=253757.docx)
Supplement: Supplementary file 1 [file get_supplementary_file.php]

**Supplemental Table 1: Hazard Ratios for kRA, demographics, lifestyle, co-morbidities, cardiovascular risk factors and incident heart failure**

| **Variable** | **Model A**  HR (95% CI)  *p-*value | **Model B**  HR (95% CI)  *p-*value | **Model C**  HR (95% CI)  *p-*value |
| --- | --- | --- | --- |
| Age | 1.05 (1.02, 1.09)  0.004 | 1.05 (1.01,1.09)  0.009 | 1.05 (1.01,1.09)  0.01 |
| Education | 0.93 (0.86, 1.01)  0.075 | 0.94 (0.87,1.02)  0.131 | 0.95 (0.87,1.03)  0.228 |
| Sex | 0.90 (0.52,1.56)  0.713 | 0.85 (0.48,1.50)  0.569 | 0.78 (0.43,1.44)  0.434 |
| kRA | 1.26 (1.06, 1.48)  0.012 | 1.24 (1.04,1.48)  0.014 | 1.21 (1.02,1.46)  0.030 |
| Total daily activity | 0.88 (0.52,1.45)  0.639 | 0.91 (0.55,1.53)  0.737 | 0.93 (0.55,1.56)  0.772 |
| Body Mass Index |  | 1.05 (1.00,1.09)  0.030 | 1.04 (1.00,1.09)  0.05 |
| Depression symptoms |  | 1.00 (0.86,1.16)  0.995 | 0.99 (0.85,1.14)  0.869 |
| Global cognition |  | 1.04 (0.69,1.58)  0.836 | 1.04 (0.69,1.58)  0.853 |
| Antianxiety medication use |  | 0.91 (0.32,2.57)  0.865 | 0.94 (0.33,2.63)  0.900 |
| Insomnia medication use |  | 0.43 (0.14,1.38)  0.158 | 0.44 (0.14,1.40)  0.163 |
| Thyroid disease |  | 0.83 (0.50,1.38)  0.473 | 0.81 (0.49,1.34)  0.413 |
| Alcohol |  | 0.83 (0.52,1.32)  0.425 | 0.77 (0.48,1.25)  0.290 |
| Urinary conditions |  | 1.90 (1.20,3.00)  0.006 | 1.70 (1.03,2.82)  0.039 |
| Smoking |  |  | 1.30 (0.81,2.10)  0.283 |
| Cholesterol medication use |  |  | 1.16 (0.73,1.86)  0.524 |
| Hypertension |  |  | 1.25 (0.67,2.31)  0.485 |
| Diabetes |  |  | 1.13 (0.62,2.07)  0.693 |
| Coronary artery disease |  |  | 1.24 (0.63,2.46)  0.528 |
| Claudication |  |  | 1.31 (0.70,2.47)  0.398 |

Cox proportional-hazards model of baseline kRA measurements, and covariates. Model A demonstrates hazard ratios for incident heart failure with age, education, sex, body mass index, total daily activity and rest portion per day. Model B was adjusted with the covariates in addition to depression symptoms, global cognition, antianxiety medication use, insomnia medication use, thyroid disease, alcohol (4 or more drinks per week) and urinary conditions. Model C includes smoking, hypertension, diabetes, cholesterol medication use, coronary artery disease and claudication. kRA: rest-activity fragmentation index, HR: hazard ratio, CI: confidence interval, *p*<0.05; *p*<0.01.
